# Supplementary material
Source: PubMed Central journal article supplement (PMC10282003)

1 **Supplement table 1.** Development over time

|                                                          | <b>2020 (N=23)</b><br>N (%) | <b>2021 (N=18)</b><br>N (%) | <b>2022 (N=23)</b><br>N (%) |
|----------------------------------------------------------|-----------------------------|-----------------------------|-----------------------------|
| <b>Sex</b>                                               |                             |                             |                             |
| Male                                                     | 16 (69.6)                   | 7 (38.9)                    | 15 (65.2)                   |
| Female                                                   | 7 (30.4)                    | 11 (61.1)                   | 8 (34.8)                    |
| <b>Age, Median (IQR)</b>                                 | 55.0 (40.0-64.0)            | 48.5 (30.5-63.5)            | 64.0 (54.0-70.0)            |
| <b>Diagnosis</b>                                         |                             |                             |                             |
| Diffuse Large B-cell lymphoma                            | 20 (87.0)                   | 13 (72.2)                   | 16 (69.6)                   |
| High grade B-cell lymphoma with MYC and BCL2/BCL6        | 0 (0)                       | 1 (5.6)                     | 1 (4.3)                     |
| Primary mediastinal B-cell lymphoma                      | 2 (8.7)                     | 2 (11.1)                    | 0 (0.0)                     |
| Transformed follicular lymphoma                          | 0 (0)                       | 0 (0.0)                     | 2 (8.7)                     |
| Mantle cell lymphoma                                     | 0 (0)                       | 0 (0.0)                     | 2 (8.7)                     |
| Follicular lymphoma                                      | 0 (0)                       | 1 (5.6)                     | 2 (8.7)                     |
| B-ALL                                                    | 1 (4.3)                     | 1 (5.6)                     | 0 (0.0)                     |
| <b>Number of previous lines of therapy, median (IQR)</b> | 3 (3-4)                     | 3 (3-4)                     | 3 (3-5)                     |
| <b>Previous auto HSCT</b>                                | 6 (26.1)                    | 5 (27.8)                    | 5 (21.7)                    |
| Time since auto HSCT, days median (IQR)                  | 721 (472-1554)              | 571 (433-1278)              | 1051 (893-2070)             |
| <b>CAR T-cell product</b>                                |                             |                             |                             |
| Axicabtagene ciloleucel                                  | 11 (47.8)                   | 10 (55.6)                   | 11(47.8)                    |
| Lisocabtagene maraleucel                                 | 0 (0)                       | 0 (0.0)                     | 1 (4.3)                     |
| Tisagenlecleucel                                         | 12 (52.2)                   | 7 (38.9)                    | 8 (34.8)                    |
| Other                                                    | 0 (0)                       | 0 (0.0)                     | 2 (8.7)                     |
| Unknown                                                  | 0 (0.0)                     | 1 (5.6)                     | 1 (4.3)                     |
| <b>CAR T-cell therapy conditioning</b>                   |                             |                             |                             |
| Fludarabine/cyclophosphamide                             | 22 (95.7)                   | 17 (94.4)                   | 22 (95.7)                   |
| Bendamustine                                             | 1 (4.3)                     | 0 (0.0)                     | 0 (0.0)                     |
| Other                                                    | 0 (0.0)                     | 0 (0.0)                     | 0 (0.0)                     |
| Unknown                                                  | 0 (0.0)                     | 1 (5.6)                     | 1 (4.3)                     |
| <b>Time since CAR T-cell infusion, days median (IQR)</b> | 158 (37.0-313)              | 247 (87.5-473.75)           | 339 (107-655)               |
| <b>Variant of SARS-CoV-2 infection</b>                   |                             |                             |                             |
| Wildtype                                                 | 5 (21.7)                    | 2 (11.1)                    | 0 (0.0)                     |
| Alpha mutation                                           | 0 (0)                       | 3 (16.7)                    | 0 (0.0)                     |
| Delta mutation                                           | 0 (0)                       | 3 (16.7)                    | 1 (4.3)                     |
| Omicron mutation                                         | 0 (0)                       | 1 (5.6)                     | 17 (73.9)                   |

|                                                                                    | 2020 (N=23)<br>N (%) | 2021 (N=18)<br>N (%) | 2022 (N=23)<br>N (%) |
|------------------------------------------------------------------------------------|----------------------|----------------------|----------------------|
| Unknown                                                                            | 18 (78.3)            | 9 (50.0)             | 5 (21.7)             |
| <b>Number of vaccinations</b>                                                      |                      |                      |                      |
| 0                                                                                  | 23 (100.0)           | 9 (50.0)             | 4 (17.4)             |
| 1                                                                                  | 0 (0)                | 1 (5.6)              | 2 (8.7)              |
| 2                                                                                  | 0 (0)                | 8 (44.4)             | 10 (43.5)            |
| 3                                                                                  | 0 (0)                | 0 (0.0)              | 3 (13.0)             |
| 4                                                                                  | 0 (0)                | 0 (0.0)              | 4 (17.4)             |
| <b>Comorbidities*</b>                                                              |                      |                      |                      |
| Not present                                                                        | 10 (43.5)            | 11 (61.1)            | 9 (39.1)             |
| 1 comorbidity                                                                      | 6 (26.1)             | 5 (27.8)             | 10 (43.5)            |
| 2 comorbidities                                                                    | 2 (8.7)              | 2 (11.1)             | 3 (13.0)             |
| ≥ 3 comorbidities                                                                  | 5 (21.7)             | 0 (0.0)              | 1 (4.3)              |
| <b>Leukocyte count (cells/mm<sup>3</sup>) at COVID-19 diagnosis, median (IQR)</b>  | 2420 (945-4930)      | 2400 (1800-3787)     | 2600 (1900-3900)     |
| <b>Lymphocyte count (cells/mm<sup>3</sup>) at COVID-19 diagnosis, median (IQR)</b> | 385 (135-1067)       | 385 (267-1119)       | 520 (270-700)        |
| <b>Neutrophil count (cells/mm<sup>3</sup>) at COVID-19 diagnosis, median (IQR)</b> | 1100 (200-3700)      | 1450 (620-2100)      | 1950 (1000-2620)     |
| <b>Severity of infection</b>                                                       |                      |                      |                      |
| At home                                                                            | 3 (13.0)             | 6 (33.3)             | 5 (21.7)             |
| Admitted to the hospital                                                           | 20 (87.0)            | 12 (66.7)            | 18 (78.3)            |
| Duration of hospitalization, days median (IQR)                                     | 27.5 (19.5-50.25)    | 16.0 (6.0-40.0)      | 7.5 (5.5-31.0)       |
| Admitted to the ICU                                                                | 11 (47.8)            | 5 (27.8)             | 2 (8.7)              |
| Duration of ICU admittance, days median (IQR)                                      | 9.0 (5-26)           | 14.0 (3.5-37)        | 45.0 (N/A)           |
| <b>Treatment with monoclonal antibodies</b>                                        | 0 (0)                | 56 (27.8)            | 9 (39.1)             |
| <b>Treatment with convalescent plasma</b>                                          | 8 (34.8)             | 3 (16.7)             | 5 (21.7)             |
| <b>Treatment with viral replication inhibitor</b>                                  | 9 (39.1)             | 4 (22.2)             | 5 (21.7)             |
| <b>Treatment with steroids</b>                                                     | 10 (43.5)            | 9 (50.0)             | 11 (47.8)            |
| <b>Treatment with tocilizumab</b>                                                  | 2 (8.7)              | 1 (5.6)              | 3 (13.0)             |
| <b>Outcome</b>                                                                     |                      |                      |                      |
| Alive                                                                              | 12 (52.2)            | 13 (72.2)            | 18 (78.3)            |
| Dead                                                                               | 11 (47.8)            | 5 (27.8)             | 5 (21.7)             |
| Cause of death                                                                     |                      |                      |                      |
| COVID-19 or contributed by COVID-19                                                | 10 (43.5)            | 4 (22.2)             | 3 (13.0)             |
| Hematological malignancy                                                           | 1 (4.3)              | 1 (5.6)              | 2 (8.7)              |

2 Abbreviations: ALL, acute lymphoid leukemia; auto HSCT, autologous hematopoietic stem-cell transplantation; CAR T, chimeric antigen receptor T cell  
3 therapy; COVID-19, coronavirus disease 2019; ICU, intensive care unit; IQR, interquartile range; SARS-CoV-2, severe acute respiratory syndrome coronavirus  
4 2

5

6 \* one or more comorbidities present (chronic cardiomyopathy, chronic pulmonary disease, diabetes, liver disease, obesity, renal impairment, smoker)

7 **Supplement table 2.** Univariable Cox regression analysis

|                                                                                             |                    | <b>Univariable<br/>95% CI</b> |                        |                        |
|---------------------------------------------------------------------------------------------|--------------------|-------------------------------|------------------------|------------------------|
|                                                                                             | <b>P<br/>value</b> | <b>HR</b>                     | <b>Lower<br/>limit</b> | <b>Upper<br/>limit</b> |
| <b>Sex</b><br>Male<br>Female                                                                | 0.886              | 1.077                         | 0.391                  | 2.965                  |
| <b>Age</b>                                                                                  | <b>0.020</b>       | 1.055                         | 1.009                  | 1.104                  |
| <b>Number of previous lines of therapy before CAR T-cell therapy</b><br>>2<br>>3            | 0.077              | 1.408                         | 0.964                  | 2.058                  |
| <b>Previous auto HSCT</b>                                                                   | 0.406              | 0.587                         | 0.167                  | 2.062                  |
| <b>CAR T-cell construct</b>                                                                 | 0.503              | 1.121                         | 0.802                  | 1.569                  |
| <b>Time since CAR T-cell infusion</b>                                                       | 0.309              | 0.999                         | 0.997                  | 1.001                  |
| <b>Year of COVID-19</b>                                                                     | 0.269              | 0.704                         | 0.377                  | 1.312                  |
| <b>Variant of SARS-CoV-2 infection</b><br>Wildtype/Alpha/Delta mutation<br>Omicron mutation | -<br><b>0.040</b>  | -<br>0.110                    | -<br>0.014             | -<br>0.900             |
| <b>Vaccination before COVID-19</b>                                                          | 0.288              | 1.339                         | 0.782                  | 2.292                  |
| <b>Comorbidities*</b><br>No<br>Yes                                                          | -<br>0.532         | -<br>1.371                    | -<br>0.509             | -<br>3.639             |
| <b>Neutrophil count at COVID-19</b>                                                         | 0.618              | 1.000                         | 1.000                  | 1.000                  |
| <b>Lymphocyte count at COVID-19 diagnosis</b>                                               | 0.522              | 1.000                         | 0.999                  | 1.001                  |
| <b>Treatment with monoclonal antibodies</b>                                                 | 0.184              | 0.033                         | 0.000                  | 5.034                  |
| <b>Treatment with convalescent plasma</b>                                                   | 0.532              | 0.696                         | 0.224                  | 2.167                  |
| <b>Treatment with viral replication inhibitor</b>                                           | 0.859              | 0.908                         | 0.315                  | 2.619                  |
| <b>Treatment with steroids</b>                                                              | 0.737              | 1.185                         | 0.441                  | 3.184                  |
| <b>Treatment with tocilizumab</b>                                                           | 0.104              | 2.842                         | 0.805                  | 10.025                 |

8 Abbreviations: auto HSCT, autologous hematopoietic stem-cell transplantation; CAR T, chimeric  
9 antigen receptor T cell therapy; CI, confidence interval; COVID-19, coronavirus disease 2019; HR,  
10 hazard ratio; SARS-CoV-2, severe acute respiratory syndrome coronavirus 2  
11

12 **Supplement table 3: Pairwise cox regression analysis**

13

|                            |                | <b>95% CI</b> |                    |                    |
|----------------------------|----------------|---------------|--------------------|--------------------|
|                            | <b>P value</b> | <b>HR</b>     | <b>Lower limit</b> | <b>Upper limit</b> |
| <b>Pairwise analysis 1</b> |                |               |                    |                    |
| Vaccination                | 0.884          | 1.084         | 0.368              | 3.191              |
| MoAb                       | 0.114          | 0.181         | 0.022              | 1.503              |
| <b>Pairwise analysis 2</b> |                |               |                    |                    |
| Vaccination                | 0.761          | 0.786         | 0.166              | 3.721              |
| Year of COVID-19           | 0.754          | 0.873         | 0.374              | 2.040              |
| <b>Pairwise analysis 3</b> |                |               |                    |                    |
| MoAb                       | 0.113          | 0.113         | 0.022              | 1.498              |
| Year of COVID-19           | 0.890          | 0.890         | 0.581              | 1.869              |
| <b>Pairwise analysis 4</b> |                |               |                    |                    |
| MoAb                       | 0.112          | 0.195         | 0.026              | 1.464              |
| Age                        | 0.008          | 1.056         | 1.015              | 1.098              |
| <b>Pairwise analysis 5</b> |                |               |                    |                    |
| Vaccination                | 0.261          | 0.556         | 0.200              | 1.547              |
| Age                        | 0.006          | 1.058         | 1.017              | 1.101              |

14

15 **Supplement figure 1. EPICOVIDEHA contribution**

16

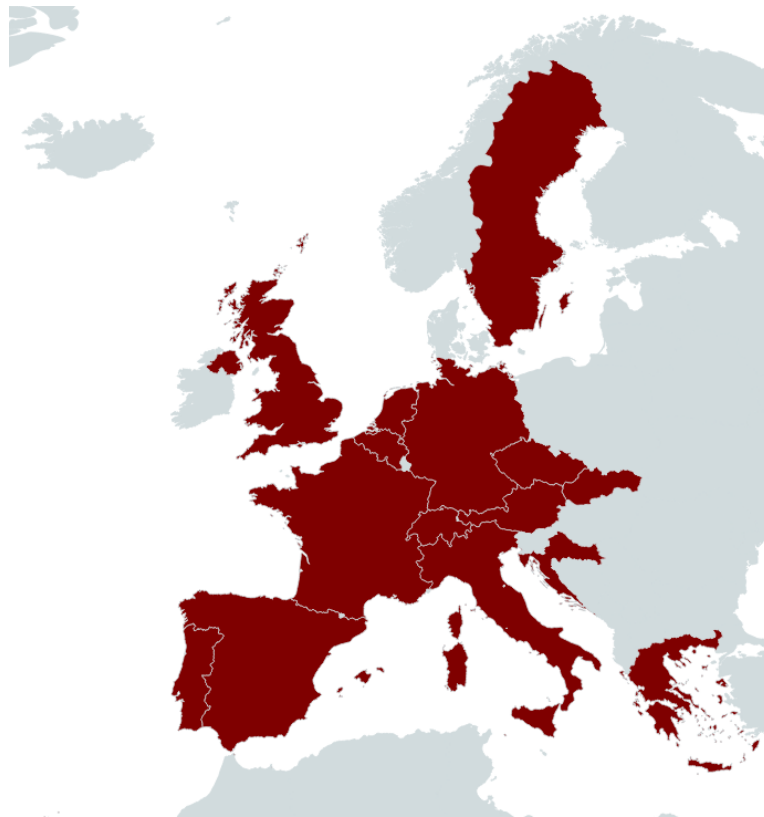

17

18 Spain (n=20), France (n=13), Italy (n=9), Netherlands (n=6), Belgium (n=3), Croatia, Czech Republic,  
19 and Germany (n=2, each), and Austria, Greece, Portugal, Slovakia, Sweden, Switzerland, and United  
20 Kingdom (n=1, each)

21 **Supplement figure 2.** Event Free Survival with and without convalescent plasma treatment

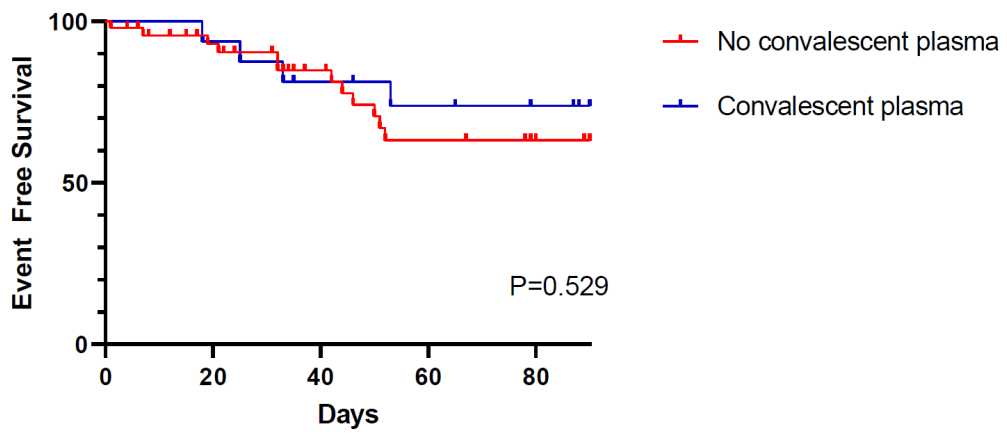

22

Supplement figure 3. Event Free survival Omicron vs other variants (Wildtype, Alpha, Delta)

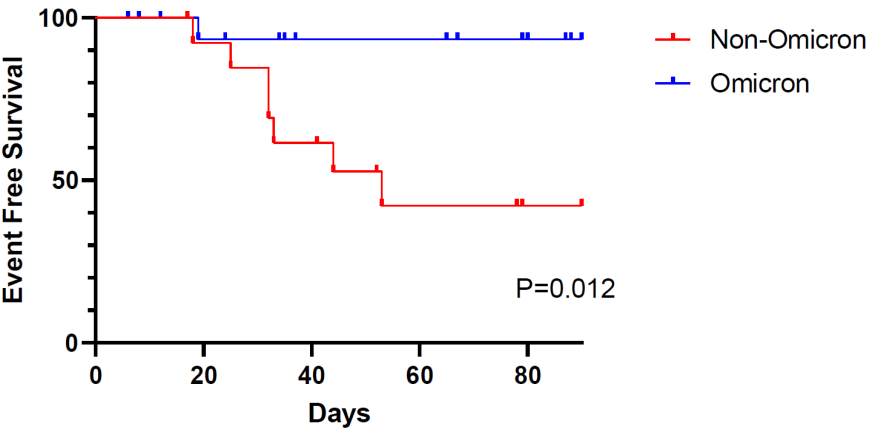



Supplement figure 4: Event free survival first vaccination before and after CAR T-cell therapy

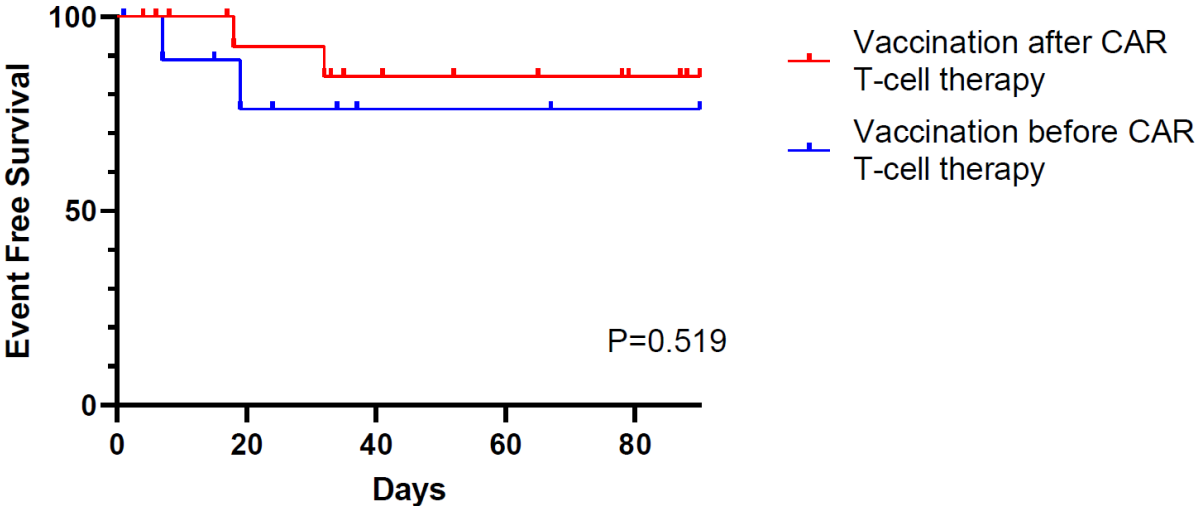

Supplement: BLOODA_ADV-2022-009578-mmc1.pdf [file BLOODA_ADV-2022-009578-mmc1.pdf]
